# Supplementary material for: A genomic island in Vibrio cholerae with VPI-1 site-specific recombination characteristics contains CRISPR-Cas and type VI secretion modules
Source: PubMed Central journal article supplement (PMC5109276; doi:10.1038/srep36891), 2016-11-15
Supplement: srep36891-s1.pdf [file srep36891-s1.pdf]

**A genomic island in *Vibrio cholerae* with VPI-1 site-specific recombination characteristics contains CRISPR-Cas and type VI secretion modules**

**Maurizio Labbate, Fabini D. Orata, Nicola K. Petty, Nathasha D. Jayatilleke, William L. King, Paul C. Kirchberger, Chris Allen, Gulay Mann, Ankur Mutreja, Nicholas R. Thomson, Yan Boucher, Ian G. Charles**

**Table S1:** List of whole genome sequences used in this study.

| Species                | Strain      | Serogroup/Serotype | Biotype   | Geographic Origin    | Source        | Year | Accession Number   |
|------------------------|-------------|--------------------|-----------|----------------------|---------------|------|--------------------|
| <i>Vibrio cholerae</i> | S12         | Non-O1/O139        |           | Sydney, Australia    | Environmental | 2009 | MDST00000000       |
| <i>Vibrio cholerae</i> | 1157-74     | O53                |           | India                | Clinical      | 1974 | JIDL00000000       |
| <i>Vibrio cholerae</i> | 12129(1)    | O1                 | El Tor    | Australia            | Environmental | 1985 | ACFQ00000000       |
| <i>Vibrio cholerae</i> | 1421-77     | O80                |           | India                | Clinical      | 1977 | JMBL00000000       |
| <i>Vibrio cholerae</i> | 2012Env-2   | Non-O1/O139        |           | Lassalle, Haiti      | Environmental | 2012 | JSTD00000000       |
| <i>Vibrio cholerae</i> | 2012Env-32  | Non-O1/O139        |           | Four-au-chaux, Haiti | Environmental | 2012 | JSTF00000000       |
| <i>Vibrio cholerae</i> | 2012Env-92  | Non-O1/O139        |           | Gressier, Haiti      | Environmental | 2012 | JSTJ00000000       |
| <i>Vibrio cholerae</i> | 490-93      | O155               |           | Thailand             | Clinical      | 1993 | JIDQ00000000       |
| <i>Vibrio cholerae</i> | 5473-62     | O31                |           | Philippines          | Clinical      | 1962 | JIDI00000000       |
| <i>Vibrio cholerae</i> | 8-76        | O77                |           | India                | Clinical      | 1976 | JIDN00000000       |
| <i>Vibrio cholerae</i> | 984-81      | O89                |           | India                | Clinical      | 1981 | JMBM00000000       |
| <i>Vibrio cholerae</i> | A325        | O1                 | Inaba     | Argentina            |               | 1993 | CWSO00000000       |
| <i>Vibrio cholerae</i> | AM-19226    | O39                |           | Bangladesh           | Clinical      | 2001 | AATY00000000       |
| <i>Vibrio cholerae</i> | BRV8        |                    |           | United Kingdom       | Clinical      |      | CTBD00000000       |
| <i>Vibrio cholerae</i> | HC-1A2      |                    |           | Haiti                | Clinical      | 2010 | AJRO00000000       |
| <i>Vibrio cholerae</i> | HE-48       | Non-O1/O139        |           | Haiti                | Environmental | 2010 | AFOR00000000       |
| <i>Vibrio cholerae</i> | MO10        | O139               |           | Madras, India        | Clinical      | 1992 | AAKF00000000       |
| <i>Vibrio cholerae</i> | MZO-2       | O14                |           | Bangladesh           | Clinical      | 2001 | AAWF00000000       |
| <i>Vibrio cholerae</i> | MZO-3       | O37                |           | Bangladesh           | Clinical      | 2001 | AAUU00000000       |
| <i>Vibrio cholerae</i> | N16961      | O1                 | El Tor    | Bangladesh           | Clinical      | 1971 | AE003852; AE003853 |
| <i>Vibrio cholerae</i> | O395        | O1                 | Classical | India                | Clinical      | 1965 | CP001235; CP001236 |
| <i>Vibrio cholerae</i> | R-18832     | O1                 | Amazonia  | Amazonas, Brazil     | Clinical      | 1992 | AFSV00000000       |
| <i>Vibrio cholerae</i> | RC385       | O135               |           | Chesapeake Bay, USA  | Environmental | 1998 | AAKH00000000       |
| <i>Vibrio cholerae</i> | TM 11079-80 | O1                 | El Tor    | Brazil               | Environmental | 1980 | ACHW00000000       |
| <i>Vibrio cholerae</i> | V51         | O141               |           | USA                  | Clinical      | 1987 | AAKI00000000       |
| <i>Vibrio cholerae</i> | V52         | O37                |           | Sudan                | Clinical      | 1968 | AAKJ00000000       |
| <i>Vibrio cholerae</i> | VCC19       |                    |           | São Paulo, Brazil    | Environmental | 1994 | ATEV00000000       |
| <i>Vibrio cholerae</i> | VL426       | Non-O1/O139        | Albensis  | Maidstone, Kent, UK  | Environmental |      | ACHV00000000       |
| <i>Vibrio cholerae</i> | ZWU0020     |                    |           | Missouri, USA        | Environmental |      | JRXX00000000       |
| <i>Vibrio metoecus</i> | OP3H        |                    |           | Oyster Pond, USA     | Environmental | 2006 | JJMN00000000       |
